# Supplementary material for: The detection of cryptic Plasmodium infection among villagers in Attapeu province, Lao PDR
Source: PLoS Negl Trop Dis. 2017 Dec 20;11(12):e0006148. doi: 10.1371/journal.pntd.0006148 (PMC5754130; doi:10.1371/journal.pntd.0006148)
Supplement: S1 Table — (XLSX) [file pntd.0006148.s002.xlsx]

## Sheet: PCBF-PCBR
S1 Table. List of PCR primers.
Type of PCR	Primer name	Sequence (5'→3')	Target gene	Target species	Reference
Primary PCR	PCBF	ATGCTTTATTATGGATTGGATGTC	Cytochrome b (mitochondrial genome)	All human Plasmodium	Putaporntip et al., 2011
	PCBR	ACATAATTATAACCTTACGGTCTG			Tanizaki et al., 2013
Secondary PCR	PFCBF	ATTATTTATTGTATTATTTTTCTG	Cytochrome b (mitochondrial genome)	P. falciparum	Putaporntip et al., 2011
	PFCBR	GATTTGTTCCGCTCAATAC			Tanizaki et al., 2013
	PVCBF	AGTTACCACAAGATATTTTT	Cytochrome b (mitochondrial genome)	P. vivax	Putaporntip et al., 2011
	PVCBR	CTGTATTGTTCTGCTCAA			Tanizaki et al., 2013
Putaporntip C, Buppan P, Jongwutiwes S, Improved performance with saliva and urine as alternative DNA sources for malaria diagnosis by mitochondrial DNA-based PCR assays. Clin Microbiol Infect 2011;17: 1484-1491.
Tanizaki R, Ujiie M, Kato Y, Iwagami M, Hashimoto A, Kutsuna S, et al. First case of Plasmodium knowlesi infection in a Japanese traveller returning from Malaysia. Malar J 2013;12: 128.
